# Supplementary material for: Genome-wide association scan and transcriptome analysis reveal candidate genes for waterlogging tolerance in cultivated barley
Source: Front Plant Sci. 2022 Dec 15;13:1048939. doi: 10.3389/fpls.2022.1048939 (PMC9798782; doi:10.3389/fpls.2022.1048939)
Supplement: Supplementary file 2 [file Table_1.xlsx]

## Sheet: 1
Table S2 The original data of WSL scores.
Number	Varieties	2019WLS-1-1	2019WLS-1-2	2019WLS-1-3	2019WLS-2-1	2019WLS-2-2	2019WLS-2-3	2019WLS-3-1	2019WLS-3-2	2019WLS-3-3	2019WLS-4-1	2019WLS-4-2	2019WLS-4-3	2020WLS-1-1	2020WLS-1-2	2020WLS-1-3	2020WLS-2-1	2020WLS-2-2	2020WLS-2-3	2020WLS-3-1	2020WLS-3-2	2020WLS-3-3	2020WLS-4-1	2020WLS-4-2	2020WLS-4-3
I-1	Bass	3	3	2	3	3	2	3	3	2	3	3	3	1	2	1	2	3	1	2	3	2	1	2	2
I-2	CDC copdand	3	3	2	3	3	3	3	3	3	3	3	3	1	2	2	2	2	2	2	3	2	2	2	2
I-3	commander	1	3	2	2	2	2	2	3	3	2	2	3	2	2	2	2	3	3	3	4	3	2	3	3
I-4	CONLON	2	2	3	2	2	3	2	4	3	2	2	3	2	1	1	3	3	2	3	3	3	1	3	3
I-5	Flinder	2	2	3	3	3	3	2	3	3	2	3	3	3	2	3	4	3	4	3	3	3	3	4	3
I-6	Hindmarsh	3	3	3	4	4	3	3	3	3	3	4	3	2	3	3	4	3	3	3	4	3	3	3	3
I-7	Irina	2	2	1	3	3	2	3	3	3	2	3	3	1	3	2	4	3	3	4	4	4	2	3	4
I-8	Metcalfe	3	3	1	3	3	2	3	3	3	2	3	3	2	3	3	4	3	3	4	3	4	3	3	4
I-9	Nendale	NA	NA	NA	NA	NA	NA	NA	NA	NA	NA	NA	NA	3	2	2	3	3	3	3	4	4	2	3	4
I-10	Scope	4	4	3	4	4	4	5	4	4	4	4	4	2	3	4	4	3	3	3	4	4	3	3	4
I-11	Sebastian	2	3	2	3	3	3	3	2	2	2	3	2	4	4	4	4	4	3	3	3	3	4	4	3
I-12	SuYin24	1	1	1	3	3	2	4	3	3	1	3	3	3	3	3	4	4	4	5	4	5	3	4	5
I-13	WDM01058	2	2	2	3	3	3	3	2	3	2	3	3	3	3	2	4	4	4	4	4	5	3	4	4
I-14	ZDM2660	2	3	1	2	2	2	3	2	2	2	2	2	3	2	2	4	4	4	5	4	4	2	4	4
I-15	ZDM2678	2	3	1	3	3	2	3	2	2	2	3	2	4	4	4	3	3	3	3	3	3	4	3	3
I-16	ZDM84	3	3	1	3	3	3	4	3	2	2	3	3	2	3	3	2	3	3	2	3	3	3	3	3
I-17	Morex	3	2	1	2	2	3	4	3	3	2	2	3	2	2	2	2	2	2	3	3	3	2	2	3
I-18	Bowman	2	2	1	3	2	2	5	3	3	2	2	4	3	2	2	3	2	2	4	3	3	2	2	3
I-19	CM72	2	2	2	4	3	3	5	3	4	2	3	4	5	5	5	5	5	5	5	4	5	5	5	5
I-20	Franklin	4	4	3	5	4	5	5	4	4	4	5	4	3	4	2	4	4	4	5	4	4	3	4	4
I-21	NaSo	3	3	2	4	3	4	5	4	5	3	4	5	4	4	3	5	5	5	5	5	5	4	5	5
I-22	TX9425	2	2	1	2	2	2	2	2	2	2	2	2	1	1	1	1	1	2	1	2	2	1	1	2
I-23	Beyewzon	2	2	1	3	3	3	4	4	3	2	3	4	3	3	2	4	4	3	4	3	3	3	4	3
I-24	Aoxuan3	3	4	1	3	3	3	3	4	3	3	3	3	4	3	3	4	4	4	3	5	4	3	4	4
I-25	Baudin	2	3	1	2	3	3	2	2	3	2	3	2	1	2	2	2	3	2	3	3	2	2	2	3
I-26	Dongjing2	3	2	1	4	3	4	4	3	3	2	4	3	1	2	2	3	4	3	4	4	3	2	3	4
I-27	Edamai6	2	2	1	1	2	2	2	2	2	2	2	2	2	2	2	2	3	2	3	4	3	2	2	3
I-28	Edamai934	2	2	1	2	NA	3	2	2	3	2	3	2	3	3	3	3	2	4	4	4	4	3	3	4
I-29	Fengnongpi1	1	2	1	2	3	3	4	3	3	1	3	3	2	2	2	2	3	3	3	4	4	2	3	4
I-30	Haiyandamai	3	4	1	2	3	3	3	3	2	3	3	3	3	3	3	3	3	3	3	4	3	3	3	3
I-31	Pudamai4	1	2	2	3	4	4	4	4	3	2	4	4	3	2	2	4	2	3	4	3	5	2	3	4
I-32	Hei09-26	1	NA	2	3	NA	2	3	NA	2	2	3	3	1	2	1	2	3	2	2	3	2	1	2	2
I-33	Hu0083	2	2	1	3	3	3	4	3	3	2	3	3	3	3	3	3	4	4	3	4	4	3	4	4
I-34	Hua11	2	2	1	2	NA	3	3	3	3	2	3	3	1	2	2	3	3	3	3	3	3	2	3	3
I-35	Jia3	2	2	1	3	3	3	3	3	3	2	3	3	2	1	2	3	3	3	4	3	3	2	3	3
I-36	Kenpi7	3	3	1	3	2	2	3	3	2	2	2	3	3	2	2	3	4	4	5	5	5	2	4	5
I-37	Zhepi33	1	2	1	2	3	1	2	3	2	1	2	2	2	2	1	3	3	3	4	4	3	2	3	4
I-38	Xihaipi44	2	2	1	3	4	3	4	4	4	2	3	4	3	2	2	4	3	4	5	5	5	2	4	5
I-39	Yangnongpi8	3	3	1	3	3	2	3	3	3	2	3	3	4	2	3	4	2	3	5	3	4	3	3	4
I-40	Lianpi9115	3	2	1	2	2	2	3	3	2	2	2	3	2	2	2	2	2	3	2	3	3	2	2	3
I-41	Yangsimai3号	2	2	1	3	3	2	4	3	3	2	3	3	2	2	1	2	3	2	4	3	3	2	2	3
I-42	Yangnongpi11	2	2	1	2	2	3	2	2	2	2	2	2	2	3	1	2	2	2	3	2	2	2	2	2
I-43	Yangnongpi12	2	3	1	2	3	4	2	3	3	2	3	3	2	2	1	3	3	3	3	4	3	2	3	3
I-44	Supi3	2	2	1	4	4	3	3	4	3	2	4	3	2	2	2	3	4	3	3	4	3	2	3	3
I-45	Kenpi15	2	3	1	3	3	3	2	2	3	2	3	2	1	2	2	2	3	3	3	3	3	2	3	3
I-46	Zhepi4	3	2	1	2	4	3	3	4	3	2	3	3	3	2	2	4	3	3	4	4	4	2	3	4
I-47	Kenpi17	3	2	1	4	4	4	4	4	3	2	4	4	3	3	3	4	4	4	4	5	5	3	4	5
I-48	Meinianghuagnjin	3	3	1	4	4	4	4	4	4	2	4	4	3	3	3	4	3	5	4	4	5	3	4	4
I-49	Supi5	2	1	1	2	1	2	2	2	2	1	2	2	1	1	2	2	2	4	3	2	4	1	3	3
I-50	Heipi2	NA	2	1	NA	3	3	NA	3	3	2	3	3	1	1	2	3	2	3	3	2	2	1	3	2
I-51	Zhenongda3	2	2	1	3	3	4	4	4	4	2	3	4	3	2	3	4	3	4	4	3	4	3	4	4
I-52	Yangnongp5	2	1	1	2	2	3	3	4	4	1	2	4	3	1	3	4	3	4	5	5	4	2	4	5
I-53	Heipi4	2	2	2	2	2	3	3	2	3	2	2	3	1	1	2	2	2	3	3	3	3	1	2	3
I-54	Supi4	2	1	1	4	2	2	3	2	2	1	3	2	1	1	2	2	2	3	3	3	3	1	2	3
I-55	Kenpi21119	3	2	2	4	2	2	2	2	2	2	3	2	1	1	3	3	3	3	3	3	3	2	3	3
I-56	Dan2	2	2	2	3	2	3	4	3	3	2	3	3	2	1	3	4	3	4	5	4	4	2	4	4
I-57	Zhepi8	2	3	2	2	2	2	3	2	2	2	2	2	1	2	2	2	2	4	4	3	4	2	3	4
I-58	Lianpi9091	1	1	2	1	2	2	3	3	2	1	2	3	1	1	2	3	3	4	4	4	5	1	3	4
I-59	Zheda9	2	2	3	2	3	3	3	2	4	2	3	3	2	1	3	3	3	4	4	3	5	2	3	4
I-60	Pudamai8	2	2	2	3	3	3	3	2	3	2	3	3	2	2	4	4	3	4	5	3	5	3	4	4
I-61	Pudamai9	3	2	2	2	2	2	3	2	2	2	2	2	2	2	3	2	3	3	3	4	3	2	3	3
I-62	Mengpi1	4	3	2	2	3	2	2	2	3	3	2	2	1	3	3	3	3	3	3	3	3	2	3	3
I-63	Mengpi3	3	3	3	4	3	4	3	2	4	3	4	3	1	3	3	4	4	4	3	4	4	2	4	4
I-64	Mengpi4	2	2	3	3	2	3	2	2	3	2	3	2	2	2	2	2	2	2	2	2	2	2	2	2
I-65	Zhepi3	2	2	2	3	2	4	4	3	3	2	3	3	2	3	3	4	4	4	4	4	4	3	4	4
I-66	Zhepi2	1	1	2	3	3	4	4	3	4	1	3	4	3	2	2	3	3	3	4	3	2	2	3	3
I-67	Zhepi6	2	2	2	2	2	3	4	3	4	2	2	4	3	3	3	4	4	4	5	4	5	3	4	5
I-68	Baodamai11	3	2	4	4	4	4	3	4	5	3	4	4	3	4	3	2	3	3	3	4	3	3	3	3
I-69	Baodamai12	4	2	3	3	2	3	2	2	4	3	3	3	3	3	3	3	2	3	3	2	3	3	3	3
I-70	Baodamai13	3	3	NA	3	3	NA	3	4	NA	3	3	4	3	4	2	4	3	4	4	4	4	3	4	4
I-71	Baodamai8	3	2	3	2	3	3	3	3	4	3	3	3	4	4	4	4	4	4	3	3	4	4	4	3
I-72	Baodamai14	4	2	3	3	3	3	3	3	4	3	3	3	3	3	4	3	3	3	3	3	3	3	3	3
I-73	Edamai7	1	1	2	3	1	2	3	2	3	1	2	3	1	2	2	2	3	3	3	3	4	2	3	3
I-74	Edamai934	2	1	1	2	2	2	3	2	3	1	2	3	1	3	1	3	4	3	4	4	2	2	3	3
I-75	Zhudamai3	3	2	2	3	2	3	3	3	3	2	3	3	2	4	3	4	5	4	5	5	4	3	4	5
I-76	Zhudamai4	3	2	2	3	3	3	3	3	3	2	3	3	2	4	3	3	3	3	3	3	3	3	3	3
I-77	Zhudamai5	2	2	2	2	2	4	4	4	4	2	4	4	1	5	5	3	5	4	3	5	4	4	4	4
I-78	Zhudamai	2	2	2	2	2	3	3	2	4	2	2	3	1	4	2	3	4	4	4	5	4	2	4	4
I-79	Kenpimai5	2	2	2	2	2	3	2	2	3	2	2	2	2	2	1	3	3	2	3	3	2	2	3	3
I-80	Kenpimai6	3	3	3	2	3	3	3	2	3	3	3	3	2	3	2	4	4	3	5	5	3	2	4	4
I-81	Kenpimai8	3	3	2	3	2	3	3	2	3	3	3	3	2	3	3	3	3	3	3	3	3	3	3	3
I-82	Kenpimai10	3	3	3	4	3	3	4	4	3	3	3	4	2	3	3	3	4	4	4	4	4	3	4	4
I-83	Kenpimai11	2	2	3	3	3	3	4	4	4	2	3	4	3	3	2	3	5	4	3	5	4	3	4	4
I-84	Fengdamai16	2	3	2	2	3	3	2	2	3	2	3	2	1	2	1	2	2	2	2	3	3	1	2	3
I-85	Fengdamai17	2	3	3	1	2	3	2	2	2	3	2	2	2	1	1	5	2	2	4	3	2	1	3	3
I-86	Fengdamai7	3	2	2	2	2	2	3	2	3	2	2	3	2	2	1	2	3	3	3	3	3	2	3	3
I-87	Fengdamai9	3	2	2	2	2	3	2	2	3	2	2	2	1	2	1	2	3	3	3	3	4	1	3	3
I-88	Fengdamai10	2	2	2	3	2	3	2	2	3	2	3	2	2	3	3	3	3	4	4	3	4	3	3	4
I-89	Fengdamai11	2	1	3	2	2	3	2	3	4	2	2	3	2	3	2	2	3	4	3	4	3	2	3	3
I-90	Fengdamai13	2	1	2	1	1	2	2	2	3	2	1	2	1	1	1	2	2	3	2	3	3	1	2	3
I-91	Fengdamai14	3	2	2	3	3	3	3	3	3	2	3	3	3	3	3	3	3	3	3	3	4	3	3	3
I-92	Yangnongpi7	2	3	3	3	3	4	3	3	4	3	3	3	2	4	2	2	4	3	3	4	3	3	3	3
I-93	Huadamai1	1	2	2	3	3	3	4	4	4	2	3	4	2	3	2	3	4	4	4	4	4	2	4	4
I-94	Huadamai2	1	2	2	1	3	2	2	3	4	2	2	3	2	2	1	2	3	3	3	3	4	2	3	3
I-95	Huadamai3	1	2	2	2	2	2	2	2	3	2	2	2	1	2	1	2	4	4	3	4	5	1	3	4
I-96	Huadamai4	1	2	2	2	3	4	3	3	4	2	3	3	1	2	1	2	3	3	3	3	4	1	3	3
I-97	Huadamai5	1	2	2	2	3	3	3	3	4	2	3	3	1	1	1	2	3	3	3	4	3	1	3	3
I-98	Huadamai6	1	2	2	3	2	2	3	3	3	2	2	3	1	3	2	3	3	4	3	3	2	2	3	3
I-99	Huadamai7	1	3	2	2	3	4	4	3	4	2	3	4	1	2	2	3	5	5	3	5	5	2	4	4
I-100	Huadamai8	1	2	2	2	3	2	2	3	3	2	2	3	1	2	1	1	4	3	2	4	2	1	3	3
I-101	Huadamai9	1	2	2	2	3	3	2	3	4	2	3	3	2	4	2	2	4	3	4	4	3	3	3	4
I-102	Huadamai10	2	3	3	3	4	4	4	4	5	3	4	4	1	2	2	2	3	3	5	4	3	2	3	4
I-103	Xinpi1	1	3	3	3	3	3	2	3	3	2	3	3	1	3	2	3	3	3	4	4	3	2	3	4
I-104	Xinpi2	2	3	4	3	4	3	3	3	3	3	3	3	3	3	4	3	3	3	4	4	3	3	3	4
I-105	Xinpi6	3	3	4	4	3	4	3	3	3	3	4	3	3	2	2	3	3	3	3	5	3	2	3	4
I-106	Supu7	2	2	2	4	2	2	3	3	3	2	3	3	1	2	2	2	3	3	3	4	4	2	3	4
I-107	Yan05184	2	2	2	3	2	3	3	3	4	2	3	3	1	2	2	2	3	2	3	4	4	2	2	4
I-108	Yan99175	2	2	2	3	3	4	3	3	5	2	3	4	1	2	2	3	4	3	4	3	3	2	3	3
I-109	Yan08191	2	2	2	3	3	4	4	4	4	2	3	4	2	3	4	4	4	5	5	5	5	3	4	5
I-110	Yan03174	1	2	2	2	2	2	2	2	2	2	2	2	3	4	4	3	4	3	3	3	3	4	3	3
I-111	Yunpi2	NA	NA	NA	NA	NA	NA	NA	NA	NA	NA	NA	NA	3	3	3	3	3	3	3	3	4	3	3	3
I-112	Yunpi10	3	2	3	2	2	2	2	3	3	3	2	3	2	3	3	2	4	4	3	4	4	3	3	4
I-113	Yunpi11	2	1	2	2	2	2	2	2	3	2	2	2	1	2	2	2	3	2	3	3	3	2	2	3
I-114	Yunpi12	3	2	3	2	2	3	2	2	3	3	2	2	1	2	2	2	2	3	3	4	3	2	2	3
I-115	Yunpi14	2	3	3	2	2	3	2	2	3	3	2	2	2	2	2	3	2	4	4	3	4	2	3	4
I-116	Xinpi3	3	2	2	3	3	3	3	3	3	2	3	3	3	2	3	2	2	4	3	3	4	3	3	3
I-117	Xinpi5	2	3	2	3	3	4	2	3	3	2	3	3	2	3	3	3	3	5	4	3	4	3	4	4
I-118	Xinpi9	NA	NA	NA	NA	NA	NA	NA	NA	NA	NA	NA	NA	3	2	2	4	4	4	4	3	4	2	4	4
I-119	Zhexiu22	2	2	2	2	3	4	3	3	4	2	3	3	2	2	2	3	3	4	4	4	4	2	3	4
I-120	Zhepi9	2	2	3	3	3	4	3	3	4	2	3	3	4	4	3	4	4	3	5	5	4	4	4	5
I-121	Zhe05-50	2	1	3	3	2	4	3	3	4	2	3	3	2	3	2	4	4	3	5	4	3	2	4	4
I-122	Zhe05-71	1	1	2	1	2	3	2	3	3	1	2	3	3	3	2	4	4	4	5	4	4	3	4	4
I-123	Zhenongda7	1	2	2	4	3	4	4	4	5	2	4	4	4	3	2	4	4	4	5	5	5	3	4	5
I-124	Russia 57	1	2	2	2	3	3	3	2	3	2	3	3	3	2	1	3	2	2	3	2	2	2	2	2
I-125	Falcon	1	1	3	2	2	3	3	3	3	2	2	3	3	2	2	2	3	3	3	4	3	2	3	3
I-126	Sterling	2	2	2	2	3	2	3	2	2	2	2	2	2	2	2	2	3	3	3	3	3	2	3	3
I-127	Zhe04-147	1	2	2	2	2	2	2	3	3	2	2	3	1	1	2	2	4	4	3	4	4	1	3	4
I-128	Zhe04-164	2	2	3	4	3	3	4	4	3	2	3	4	4	3	4	4	3	4	4	3	4	4	4	4
I-129	Zhe05-55	2	2	2	3	3	3	3	3	2	2	3	3	3	2	2	3	3	4	4	3	4	2	3	4
I-130	Zhe04-9	2	3	3	2	4	3	3	4	2	3	3	3	2	2	2	2	3	4	3	3	4	2	3	3
I-131	Zhe09-079	2	2	2	2	2	2	3	4	3	2	2	3	3	2	3	3	3	3	3	3	3	3	3	3
I-132	Zhe09-080	2	2	1	3	3	3	4	4	4	2	3	4	2	3	3	4	4	4	5	5	5	3	4	5
I-133	Zhe05-071	1	2	2	3	3	3	4	4	4	2	3	4	4	2	3	4	3	4	4	4	4	3	4	4
I-134	Zhu200501	2	3	2	2	3	2	2	2	2	2	2	2	2	2	2	2	3	3	4	4	3	2	3	4
I-135	Zhe05-074	2	3	1	4	3	4	3	3	4	2	4	3	2	3	2	2	3	3	4	4	4	2	3	4
I-136	Zheda09-048	2	2	2	3	4	3	4	3	3	2	3	3	2	2	2	3	3	4	4	4	5	2	3	4
I-137	E97434	2	2	3	2	2	3	4	4	4	2	2	4	2	2	2	4	4	4	4	4	5	2	4	4
I-138	Zhe10-052	2	2	2	3	3	2	4	3	3	2	3	3	2	3	3	2	4	3	2	3	3	3	3	3
I-139	Zhe10-098	3	3	3	4	4	3	4	3	3	3	4	3	1	1	2	1	3	3	2	2	3	1	2	2
I-140	Zhe10-192	2	3	2	4	4	3	4	4	4	2	4	4	3	2	4	4	4	5	4	3	5	3	4	4
I-141	Zhe02-28	2	1	3	3	2	3	3	3	3	2	3	3	3	3	2	3	3	3	3	2	3	3	3	3
I-142	Zhe07-144	1	2	2	2	3	3	3	2	2	2	3	2	2	2	2	3	4	3	3	4	4	2	3	4
I-143	Yan91048	2	3	3	3	3	3	3	3	3	3	3	3	3	1	1	4	3	3	5	4	3	2	3	4
I-144	Yanxuan1	3	3	2	3	3	2	4	3	3	3	3	3	3	2	2	4	4	5	5	4	4	2	4	4
I-145	Zhe98-26	3	3	3	4	4	4	4	5	4	3	4	3	2	2	3	4	4	5	5	5	5	2	4	5
I-146	Jipi3	2	3	3	2	2	2	2	2	2	3	2	2	1	2	1	1	3	3	2	2	2	1	2	2
I-147	Jipi2	3	3	3	3	4	3	4	4	4	3	3	4	4	4	5	5	4	5	5	4	5	4	5	5
I-148	Zhenongda3	2	2	2	3	2	3	4	3	4	2	3	4	2	3	3	2	3	2	2	2	2	3	2	2
I-149	Lianpi1	1	2	2	2	2	3	3	4	4	2	2	4	2	2	2	4	4	4	4	3	5	2	4	4
I-150	Edamai8	3	3	2	3	2	2	3	3	2	3	2	3	3	1	3	3	2	3	3	3	3	2	3	3
I-151	Pudamai7	2	2	3	3	3	3	3	4	3	2	3	3	3	2	3	5	3	4	4	3	4	3	4	4
I-152	Russia 57	3	4	3	3	3	3	2	2	2	3	3	2	2	2	2	2	3	2	2	3	2	2	2	2
I-153	CAN 8854	2	2	3	3	2	3	3	3	3	2	3	3	2	2	2	3	2	3	4	2	3	2	3	3
I-154	Jiangningqingpi	3	2	2	2	2	3	3	2	3	2	2	3	1	1	2	2	2	3	2	2	3	1	2	2
I-155	Tongu bori	3	3	3	4	2	3	3	2	2	3	3	2	1	2	2	2	2	2	2	3	3	2	2	3
I-156	Orge d'Hiver 113	2	2	2	3	2	4	3	3	2	2	3	3	3	3	3	3	4	4	3	4	4	3	4	4
I-157	Maodamai	3	3	3	3	4	4	3	4	5	3	4	4	4	4	4	3	4	4	4	5	5	4	4	5
I-158	Carola	2	3	3	3	2	2	2	2	2	3	2	2	2	3	2	3	3	4	3	4	4	2	3	4
I-159	Xiaozhanmang	3	3	2	2	4	3	2	2	2	3	3	2	3	3	3	3	3	3	3	4	4	3	3	4
I-160	Guangqu2	2	3	2	3	4	2	3	3	3	2	3	3	3	3	2	4	4	3	4	5	4	3	4	4
I-161	Jiamusi2	3	3	3	3	3	3	3	3	3	3	3	3	1	2	2	1	3	4	2	3	2	2	3	2
I-162	C.I.16138Algerian	3	3	3	2	2	2	2	2	3	3	2	2	3	3	3	3	4	2	3	4	3	3	3	3
I-163	Changshudongyangdamai	2	2	2	2	2	3	2	2	2	2	2	2	2	2	2	1	3	3	2	3	2	2	2	2
I-164	HOR3298	2	2	3	3	3	3	3	3	3	2	3	3	2	2	3	3	3	2	3	3	3	2	3	3
I-165	Misato Golden	3	3	2	4	3	4	4	4	5	3	4	4	3	3	4	4	5	5	5	5	5	3	5	5
I-166	Atlanta	3	3	3	3	3	3	3	3	3	3	3	3	3	3	3	3	3	3	3	3	3	3	3	3
I-167	Bronco Marriott	2	2	2	3	3	3	3	3	3	2	3	3	3	2	2	3	3	3	3	3	3	2	3	3
I-168	Prior	NA	NA	NA	NA	NA	NA	NA	NA	NA	NA	NA	NA	2	3	2	2	3	3	2	3	3	2	3	3
I-169	Liuhesileng	2	2	1	2	2	2	2	2	2	2	2	2	1	1	1	1	1	2	1	2	2	1	1	2
I-170	Hiberna	3	2	2	2	3	2	3	3	3	2	2	3	1	1	1	2	2	3	2	2	3	1	2	2
I-171	Linanliuleng	2	2	2	3	3	3	3	3	3	2	3	3	2	3	2	3	3	3	3	3	3	2	3	3
I-172	Perga	NA	2	2	NA	3	3	3	3	3	2	3	3	3	3	3	4	3	4	3	3	4	3	4	3
I-173	Yanchengzaoliuleng	3	3	2	4	4	3	3	3	3	3	4	3	1	2	2	2	2	3	2	2	3	2	2	2
I-174	Jorlnson	3	2	2	3	3	3	3	3	3	2	3	3	1	2	2	2	2	3	2	2	2	2	2	2
I-175	Bangxingdamai	3	2	2	2	2	2	2	2	2	2	2	2	2	2	2	2	2	3	2	2	2	2	2	2
I-176	Linshan	4	3	3	3	2	3	3	3	3	3	3	3	4	4	4	4	4	5	3	4	4	4	4	4
I-177	American standed	NA	NA	NA	NA	NA	NA	NA	NA	NA	NA	NA	NA	3	2	2	3	4	4	4	3	3	2	4	3
I-178	Liulengdamai	3	3	4	4	3	4	4	3	4	3	4	4	3	3	3	3	3	4	4	4	3	3	3	4
I-179	Argyle	2	2	2	2	2	2	3	3	3	2	2	3	2	3	3	3	3	3	3	4	4	3	3	4
I-180	Helena	4	3	2	3	3	3	3	3	3	3	3	3	2	2	2	2	3	4	3	3	3	2	3	3
I-181	Taihoku A	2	3	1	2	3	4	3	3	3	2	3	3	4	3	3	4	4	4	5	3	4	3	4	4
I-182	Liulengzidamai	3	2	2	2	3	2	3	2	2	2	2	2	2	2	2	2	2	2	3	2	2	2	2	2
I-183	Bulgarian 347	3	2	2	4	4	4	3	3	3	2	4	3	3	3	2	3	3	3	4	3	3	3	3	3
I-184	Favorit	2	2	3	3	4	3	3	4	4	2	3	4	3	3	2	3	3	4	4	4	4	3	3	4
I-185	Changmangdamai	3	3	3	3	3	3	3	3	3	3	3	3	2	2	3	3	4	3	4	4	4	2	3	4
I-186	Gairdner	3	3	2	3	3	2	3	3	2	3	3	3	1	1	2	2	3	3	3	3	3	1	3	3
I-187	Rugaohongmang	2	2	2	2	2	2	2	2	2	2	2	2	1	1	2	2	2	3	3	2	3	1	2	3
I-188	Franka	2	2	1	2	3	2	3	3	2	2	2	3	3	2	2	3	3	3	4	3	4	2	3	4
I-189	AcBurman	4	2	2	4	4	2	3	4	3	3	3	3	3	2	2	3	3	3	3	3	3	2	3	3
I-190	Suyin27	2	1	1	2	2	1	2	2	2	1	2	2	1	1	2	1	3	NA	2	3	3	1	2	3
I-191	Changdamai	3	2	2	3	4	2	3	3	2	2	3	3	3	2	3	3	4	3	3	4	4	3	3	4
I-192	OR71	2	2	2	2	3	3	3	3	3	2	3	3	2	3	2	3	4	4	3	4	4	2	4	4
I-193	Yizhengsilengzi	2	2	2	3	2	3	3	3	3	2	3	3	2	1	3	2	2	4	3	2	3	2	3	3
I-194	Eqicaomai	3	2	2	2	3	3	2	3	3	2	3	3	1	1	3	2	2	3	2	2	3	2	2	2
I-195	F10 BEI 324	NA	NA	NA	NA	NA	NA	NA	NA	NA	NA	NA	NA	NA	NA	NA	NA	NA	NA	NA	NA	NA	NA	NA	NA
I-196	HOR4229	3	3	3	3	3	3	3	3	3	3	3	3	2	2	3	2	2	3	3	3	3	2	2	3
I-197	Smooth Aun86	3	3	3	3	3	4	3	4	4	3	3	4	2	3	2	3	3	3	3	3	3	2	3	3
I-198	Yangao Damai	2	4	3	3	4	4	3	4	4	3	4	4	3	2	2	4	2	3	4	4	3	2	3	4
I-199	Монпкалъм	4	3	3	4	4	4	4	4	4	3	4	4	3	2	1	2	2	2	3	3	3	2	2	3
I-200	Chiba damai	2	2	1	2	1	1	3	3	3	2	1	3	1	1	1	2	2	1	2	2	2	1	2	2
I-201	Mang damai	3	2	2	3	2	1	3	3	2	2	2	3	1	1	1	1	2	2	1	3	2	1	2	2
I-202	Pinzhognhao32121	2	2	2	3	NA	3	3	NA	3	2	3	3	1	1	1	2	3	2	2	2	2	1	2	2
I-203	HOR1015	2	2	3	3	3	3	3	3	3	2	3	3	2	2	1	3	3	3	3	3	4	2	3	3
I-204	Taixingzisileng	3	3	2	4	4	4	4	4	4	3	4	4	3	3	3	3	3	4	3	3	4	3	3	3
I-205	Teisen	2	3	3	3	3	3	3	3	3	3	3	3	1	2	2	2	3	2	2	3	3	2	2	3
I-206	HOR996	2	3	2	2	3	3	3	3	4	2	3	3	1	2	2	2	4	2	2	3	3	2	3	3
I-207	Fenghualiulengyang damai	2	3	2	3	3	4	4	4	4	2	3	4	1	3	3	2	3	3	3	4	4	2	3	4
I-208	Hosokawanishiki	2	2	2	3	3	2	3	3	3	2	3	3	1	2	2	3	3	3	4	3	3	2	3	3
I-209	Chifenghei	2	2	2	2	2	3	3	3	3	2	2	3	1	2	2	2	4	3	3	3	3	2	3	3
I-210	Banjo	3	3	2	4	4	3	3	3	3	3	4	3	2	2	2	5	4	3	5	4	4	2	4	4
I-211	Opal	2	3	3	3	4	4	4	4	5	3	4	4	2	2	2	2	2	3	3	3	3	2	2	3
I-212	Funingbai	2	1	2	2	2	3	2	2	3	2	2	2	3	3	2	3	4	4	5	5	5	3	4	5
I-213	Badia	2	NA	NA	NA	NA	NA	NA	NA	NA	2	NA	NA	2	3	2	3	4	4	4	5	4	2	4	4
I-214	Mokusekko 3	2	3	3	4	4	4	4	5	5	3	4	5	2	2	2	3	4	3	4	3	3	2	3	3
I-215	No. 1337	2	3	3	3	4	4	4	4	4	3	4	4	3	4	2	3	4	3	3	3	3	3	3	3
I-216	Kawa Bako	2	3	3	2	3	3	3	3	2	3	3	3	4	4	2	4	3	3	4	3	3	3	3	3
I-217	Tianxing	2	3	2	3	2	2	3	3	2	2	2	3	2	3	3	4	3	4	4	4	4	3	4	4
I-218	Dongjing2	2	2	2	2	3	3	2	3	2	2	3	2	4	4	3	4	5	4	4	5	4	4	4	4
I-219	Pinzhonghao 37337	1	1	1	1	1	1	2	2	2	1	1	2	NA	NA	NA	NA	NA	NA	NA	NA	NA	NA	NA	NA
I-220	Suwon No. 5	2	2	1	3	2	1	4	3	3	2	2	3	2	2	NA	3	3	NA	4	4	NA	2	3	4
I-221	Shengxianzaosileng	3	3	3	2	4	4	3	3	4	3	3	3	4	3	2	3	4	3	4	4	3	3	3	4
I-222	HOR3298	NA	2	2	NA	2	3	NA	3	3	2	3	3	2	3	2	NA	3	3	NA	3	3	2	3	3
I-223	Rudognzaoliuleng	1	2	2	1	2	3	2	2	2	2	2	2	2	2	2	2	2	3	3	3	3	2	2	3
I-224	Wuhu60	1	3	2	2	3	3	3	3	2	2	3	3	2	2	2	2	2	3	3	3	4	2	2	3
I-225	Siyuehuang	2	2	2	2	3	3	4	3	3	2	3	3	2	3	2	3	4	3	4	4	3	2	3	4
I-226	Changbaimangpi damai	3	2	2	3	2	3	4	3	3	2	3	3	3	2	2	3	4	4	4	5	4	2	4	4
I-227	Shijiazhuang damai	4	4	3	4	4	4	4	4	4	4	4	4	2	1	2	2	2	3	3	2	3	2	2	3
I-228	Gloria"s"/Come"s"	2	3	2	3	3	3	4	3	3	2	3	3	3	2	2	3	3	3	3	2	3	2	3	3
I-229	HOR1014	3	2	2	3	2	2	3	3	2	2	2	3	3	3	2	3	4	3	4	2	4	3	3	3
I-230	HOR4162	2	2	2	2	2	2	3	3	2	2	2	3	2	2	3	3	4	3	3	3	3	2	3	3
I-231	Daishanliuleng	3	2	2	3	3	3	3	3	2	2	3	3	2	2	2	2	2	2	2	2	2	2	2	2
I-232	Xinchangliuleng	3	2	2	3	2	2	3	3	2	2	2	3	2	1	2	3	2	4	3	2	4	2	3	3
I-233	Liulengduanmanggulaomai	3	4	3	3	4	4	4	3	3	3	4	3	2	1	2	3	2	4	3	3	4	2	3	3
I-234	Zanqiluo	2	3	3	3	4	4	4	4	4	3	4	4	2	3	4	2	3	4	4	4	5	3	3	4
I-235	Jackson No. 1	2	2	2	2	2	2	3	3	3	2	2	3	1	1	2	4	3	3	3	3	2	1	3	3
I-236	Pingliangdongdamai	3	2	2	3	3	2	4	4	3	2	3	4	4	4	3	3	3	4	3	3	3	4	3	3
I-237	Robust	3	2	2	2	3	4	3	3	3	2	3	3	3	3	3	2	4	4	4	4	3	3	3	4
I-238	Omugi zairai shu	2	NA	3	3	3	4	3	3	3	3	3	3	3	3	2	2	4	3	4	4	3	3	3	4
I-239	Brunhild	2	3	2	3	2	2	3	2	2	2	2	2	2	1	3	3	3	3	3	3	4	2	3	3
I-240	Liulengzidamai	2	2	2	3	3	3	3	3	3	2	3	3	3	2	2	4	4	3	3	3	3	2	4	3
I-241	Jiangjunmudamai	3	3	3	3	2	3	3	3	4	3	3	3	3	3	2	4	4	4	5	5	3	3	4	4
I-242	Supi7	2	2	1	3	2	2	4	3	3	2	2	3	2	3	3	3	4	4	4	4	3	3	4	4
I-243	Supi8	3	2	1	3	3	2	3	4	3	2	3	3	1	1	2	3	4	4	5	5	4	1	4	5
I-244	Supi11	2	1	1	2	3	2	3	3	2	1	2	3	1	1	3	3	4	4	4	4	4	2	4	4
I-245	Yan05028	2	2	1	2	2	2	3	3	3	2	2	3	2	2	2	4	3	2	4	4	4	2	3	4
I-246	Yan04189	1	2	1	3	3	3	4	4	4	1	3	4	1	2	2	4	3	3	4	4	4	2	3	4
I-247	Supi6	2	2	1	3	3	3	3	4	4	2	3	4	1	1	1	4	4	3	3	3	4	1	4	3
I-248	Yan05170	3	3	1	4	4	3	3	4	2	2	4	3	4	1	3	4	4	5	5	5	5	3	4	5
I-249	Yan08218	2	3	1	3	3	2	3	4	2	2	3	3	1	1	2	3	4	4	4	4	4	1	4	4
I-250	Yan09085	2	3	1	3	3	2	NA	NA	NA	NA	NA	NA	1	1	2	3	3	3	3	3	4	1	3	3
