# Supplementary material for: Genome-wide association scan and transcriptome analysis reveal candidate genes for waterlogging tolerance in cultivated barley
Source: Front Plant Sci. 2022 Dec 15;13:1048939. doi: 10.3389/fpls.2022.1048939 (PMC9798782; doi:10.3389/fpls.2022.1048939)
Supplement: Supplementary file 3 [file Table_2.xlsx]

## Sheet: GO
				Table S6. Summary of GO results of the differentially expressed genes
	TX9425_72 vs TX9425_CK								Franklin_72 vs Franklin_CK
	GO_function	GO_ID	GO_Term	gene number	Total gene number	pvalue			GO_function	GO_ID	GO_Term	gene number	Total gene number	pvalue
	biological_process	GO:0098542	defense response to other organism	5	3477	0.0186918			biological_process	GO:0009617	response to bacterium	5	5211	0.0312764
		GO:0043207	response to external biotic stimulus	5	3477	0.0186918				GO:0042742	defense response to bacterium	5	5211	0.0312764
		GO:0050832	defense response to fungus	5	3477	0.0186918				GO:0050832	defense response to fungus	6	5211	0.0284481
		GO:0051707	response to other organism	5	3477	0.0186918				GO:0009620	response to fungus	6	5211	0.0284481
		GO:0009620	response to fungus	5	3477	0.0186918				GO:0098542	defense response to other organism	6	5211	0.0284481
		GO:0006002	fructose 6-phosphate metabolic process	5	3477	0.0493521				GO:0051707	response to other organism	6	5211	0.0284481
		GO:0006541	glutamine metabolic process	6	3477	0.00856194				GO:0043207	response to external biotic stimulus	6	5211	0.0284481
		GO:0006559	L-phenylalanine catabolic process	6	3477	0.0125879				GO:0045892	negative regulation of transcription, DNA-templated	7	5211	0.0484575
		GO:1902222	erythrose 4-phosphate/phosphoenolpyruvate family amino acid catabolic process	6	3477	0.0125879				GO:1902679	negative regulation of RNA biosynthetic process	7	5211	0.0484575
		GO:0009074	aromatic amino acid family catabolic process	6	3477	0.0242557				GO:0051253	negative regulation of RNA metabolic process	7	5211	0.0484575
		GO:0009790	embryo development	6	3477	0.0242557				GO:1903507	negative regulation of nucleic acid-templated transcription	7	5211	0.0484575
		GO:1903507	negative regulation of nucleic acid-templated transcription	7	3477	0.00848401				GO:0030418	nicotianamine biosynthetic process	9	5211	0.0186932
		GO:0051253	negative regulation of RNA metabolic process	7	3477	0.00848401				GO:0030417	nicotianamine metabolic process	9	5211	0.0186932
		GO:1902679	negative regulation of RNA biosynthetic process	7	3477	0.00848401				GO:0072351	tricarboxylic acid biosynthetic process	9	5211	0.0186932
		GO:0045892	negative regulation of transcription, DNA-templated	7	3477	0.00848401				GO:0006558	L-phenylalanine metabolic process	9	5211	0.0254387
		GO:0045934	negative regulation of nucleobase-containing compound metabolic process	7	3477	0.0118214				GO:1902221	erythrose 4-phosphate/phosphoenolpyruvate family amino acid metabolic process	9	5211	0.0254387
		GO:0040007	growth	7	3477	0.0346365				GO:0009605	response to external stimulus	9	5211	0.0337386
		GO:0010215	cellulose microfibril organization	7	3477	0.0346365				GO:0072350	tricarboxylic acid metabolic process	9	5211	0.0437291
		GO:0043062	extracellular structure organization	7	3477	0.0346365				GO:1901606	alpha-amino acid catabolic process	10	5211	0.045866
		GO:0030198	extracellular matrix organization	7	3477	0.0346365				GO:0009607	response to biotic stimulus	15	5211	0.0116571
		GO:0016049	cell growth	7	3477	0.0346365				GO:0009309	amine biosynthetic process	15	5211	0.02258
		GO:0072351	tricarboxylic acid biosynthetic process	8	3477	0.00572875				GO:0042401	cellular biogenic amine biosynthetic process	15	5211	0.02258
		GO:0030417	nicotianamine metabolic process	8	3477	0.00572875				GO:0010411	xyloglucan metabolic process	15	5211	0.0398149
		GO:0030418	nicotianamine biosynthetic process	8	3477	0.00572875				GO:0044282	small molecule catabolic process	15	5211	0.0472299
		GO:1902221	erythrose 4-phosphate/phosphoenolpyruvate family amino acid metabolic process	8	3477	0.00790417				GO:0009064	glutamine family amino acid metabolic process	16	5211	0.0277916
		GO:0006558	L-phenylalanine metabolic process	8	3477	0.00790417				GO:0030244	cellulose biosynthetic process	17	5211	0.0390352
		GO:0072350	tricarboxylic acid metabolic process	8	3477	0.0140291				GO:0030243	cellulose metabolic process	17	5211	0.0390352
		GO:0009808	lignin metabolic process	9	3477	0.0238802				GO:0010383	cell wall polysaccharide metabolic process	18	5211	0.0327701
		GO:0046274	lignin catabolic process	9	3477	0.0238802				GO:0010410	hemicellulose metabolic process	18	5211	0.0327701
		GO:0046271	phenylpropanoid catabolic process	9	3477	0.0238802				GO:0009664	plant-type cell wall organization	20	5211	0.0113477
		GO:0009698	phenylpropanoid metabolic process	9	3477	0.0238802				GO:0071669	plant-type cell wall organization or biogenesis	20	5211	0.0113477
		GO:0019748	secondary metabolic process	9	3477	0.0498614				GO:0006576	cellular biogenic amine metabolic process	20	5211	0.0164377
		GO:1901606	alpha-amino acid catabolic process	10	3477	0.00477956				GO:0044106	cellular amine metabolic process	20	5211	0.0164377
		GO:0009063	cellular amino acid catabolic process	10	3477	0.00811332				GO:0044272	sulfur compound biosynthetic process	22	5211	0.0138539
		GO:0016054	organic acid catabolic process	11	3477	0.0134617				GO:0006090	pyruvate metabolic process	25	5211	0.041744
		GO:0046395	carboxylic acid catabolic process	11	3477	0.0134617				GO:0006260	DNA replication	27	5211	0.0438285
		GO:0010411	xyloglucan metabolic process	12	3477	0.0195334				GO:0006928	movement of cell or subcellular component	32	5211	0.00499475
		GO:0044282	small molecule catabolic process	12	3477	0.0231268				GO:0007018	microtubule-based movement	32	5211	0.00499475
		GO:0009607	response to biotic stimulus	13	3477	0.00249745				GO:0006790	sulfur compound metabolic process	37	5211	0.00301931
		GO:0000003	reproduction	13	3477	0.0112941				GO:0006073	cellular glucan metabolic process	41	5211	0.00580511
		GO:0044703	multi-organism reproductive process	13	3477	0.0112941				GO:0044042	glucan metabolic process	41	5211	0.00580511
		GO:0019953	sexual reproduction	13	3477	0.0112941				GO:0044264	cellular polysaccharide metabolic process	44	5211	0.00475323
		GO:0051704	multi-organism process	13	3477	0.0112941				GO:0005976	polysaccharide metabolic process	46	5211	0.00738774
		GO:0009309	amine biosynthetic process	14	3477	0.00216758				GO:0034728	nucleosome organization	48	5211	6.34e-07
		GO:0042401	cellular biogenic amine biosynthetic process	14	3477	0.00216758				GO:0006334	nucleosome assembly	48	5211	6.34e-07
		GO:0009064	glutamine family amino acid metabolic process	14	3477	0.00526247				GO:0071824	protein-DNA complex subunit organization	48	5211	8.37e-07
		GO:0010383	cell wall polysaccharide metabolic process	15	3477	0.0092761				GO:0065004	protein-DNA complex assembly	48	5211	8.37e-07
		GO:0010410	hemicellulose metabolic process	15	3477	0.0092761				GO:0007017	microtubule-based process	50	5211	0.00143488
		GO:0006576	cellular biogenic amine metabolic process	15	3477	0.0129279				GO:1901605	alpha-amino acid metabolic process	52	5211	0.0076675
		GO:0044106	cellular amine metabolic process	15	3477	0.0129279				GO:0006325	chromatin organization	55	5211	0.000568662
		GO:0019439	aromatic compound catabolic process	17	3477	0.0341712				GO:0034622	cellular protein-containing complex assembly	62	5211	6.28e-05
		GO:1901361	organic cyclic compound catabolic process	18	3477	0.0196663				GO:0065003	protein-containing complex assembly	63	5211	0.00013887
		GO:0006855	drug transmembrane transport	18	3477	0.0317694				GO:0044262	cellular carbohydrate metabolic process	66	5211	0.00477394
		GO:0015893	drug transport	18	3477	0.0317694				GO:0043933	protein-containing complex subunit organization	68	5211	0.00013336
		GO:0030243	cellulose metabolic process	19	3477	0.000250669				GO:0022607	cellular component assembly	75	5211	8e-05
		GO:0030244	cellulose biosynthetic process	19	3477	0.000250669				GO:0030001	metal ion transport	82	5211	0.00781659
		GO:0051273	beta-glucan metabolic process	19	3477	0.00372316				GO:0006520	cellular amino acid metabolic process	90	5211	0.0276253
		GO:0051274	beta-glucan biosynthetic process	19	3477	0.00372316				GO:0006979	response to oxidative stress	102	5211	2.56e-05
		GO:1901565	organonitrogen compound catabolic process	19	3477	0.0263848				GO:0016043	cellular component organization	138	5211	0.0187201
		GO:0009308	amine metabolic process	19	3477	0.0295257				GO:0006811	ion transport	157	5211	0.0406089
		GO:0009250	glucan biosynthetic process	20	3477	0.00679858				GO:0071840	cellular component organization or biogenesis	160	5211	0.0112548
		GO:0044036	cell wall macromolecule metabolic process	21	3477	0.00357277				GO:0019752	carboxylic acid metabolic process	171	5211	0.0104826
		GO:0006757	ATP generation from ADP	22	3477	0.00128523				GO:0043436	oxoacid metabolic process	174	5211	0.00726941
		GO:0009135	purine nucleoside diphosphate metabolic process	22	3477	0.00128523				GO:0006082	organic acid metabolic process	175	5211	0.00665182
		GO:0009185	ribonucleoside diphosphate metabolic process	22	3477	0.00128523				GO:0006950	response to stress	200	5211	0.015763
		GO:0006096	glycolytic process	22	3477	0.00128523				GO:0050896	response to stimulus	227	5211	0.0450266
		GO:0046031	ADP metabolic process	22	3477	0.00128523				GO:0055085	transmembrane transport	232	5211	0.0129111
		GO:0009179	purine ribonucleoside diphosphate metabolic process	22	3477	0.00128523				GO:0044281	small molecule metabolic process	252	5211	0.0109395
		GO:0006165	nucleoside diphosphate phosphorylation	22	3477	0.00297075				GO:0005975	carbohydrate metabolic process	267	5211	3.27e-06
		GO:0046939	nucleotide phosphorylation	22	3477	0.00297075				GO:0016310	phosphorylation	433	5211	0.0499955
		GO:0009132	nucleoside diphosphate metabolic process	22	3477	0.00346965				GO:0006810	transport	442	5211	0.0212832
		GO:0006090	pyruvate metabolic process	23	3477	0.00210983				GO:0051234	establishment of localization	442	5211	0.0251026
		GO:0033692	cellular polysaccharide biosynthetic process	23	3477	0.00335417				GO:0051179	localization	445	5211	0.0253627
		GO:0000271	polysaccharide biosynthetic process	23	3477	0.00335417				GO:0055114	oxidation-reduction process	542	5211	0.0119446
		GO:0071669	plant-type cell wall organization or biogenesis	25	3477	1.47e-06			cellular_component	GO:0048046	apoplast	27	5211	0.00829786
		GO:0009664	plant-type cell wall organization	25	3477	1.47e-06				GO:0005576	extracellular region	85	5211	7.81e-05
		GO:0016052	carbohydrate catabolic process	26	3477	0.000749587				GO:0000786	nucleosome	141	5211	0.000174667
		GO:0045229	external encapsulating structure organization	27	3477	0.00186102				GO:0044815	DNA packaging complex	142	5211	2.56e-05
		GO:0071555	cell wall organization	27	3477	0.00186102				GO:0032993	protein-DNA complex	142	5211	2.58e-05
		GO:0034637	cellular carbohydrate biosynthetic process	29	3477	0.0170978				GO:0005634	nucleus	210	5211	0.000174667
		GO:0034728	nucleosome organization	31	3477	4.2e-05				GO:0043231	intracellular membrane-bounded organelle	232	5211	0.00730288
		GO:0006334	nucleosome assembly	31	3477	4.2e-05				GO:0043227	membrane-bounded organelle	239	5211	0.00437653
		GO:0071824	protein-DNA complex subunit organization	31	3477	5.12e-05				GO:0016020	membrane	384	5211	0.00418961
		GO:0065004	protein-DNA complex assembly	31	3477	5.12e-05			molecular_function	GO:0030151	molybdenum ion binding	5	5211	0.0312764
		GO:0006928	movement of cell or subcellular component	32	3477	1.02e-05				GO:0046912	transferase activity, transferring acyl groups, acyl groups converted into alkyl on transfer	7	5211	0.0484575
		GO:0007018	microtubule-based movement	32	3477	1.02e-05				GO:0030410	nicotianamine synthase activity	9	5211	0.0186932
		GO:0016051	carbohydrate biosynthetic process	33	3477	0.0086543				GO:0016769	transferase activity, transferring nitrogenous groups	14	5211	0.0270606
		GO:0006325	chromatin organization	33	3477	0.01656				GO:0008483	transaminase activity	14	5211	0.0270606
		GO:0044042	glucan metabolic process	34	3477	0.000452053				GO:0005516	calmodulin binding	14	5211	0.0398924
		GO:0006073	cellular glucan metabolic process	34	3477	0.000452053				GO:0016760	cellulose synthase (UDP-forming) activity	16	5211	0.0332764
		GO:1901605	alpha-amino acid metabolic process	34	3477	0.0272174				GO:0016759	cellulose synthase activity	16	5211	0.0332764
		GO:0022414	reproductive process	36	3477	0.0313967				GO:0015103	inorganic anion transmembrane transporter activity	17	5211	0.00824086
		GO:0044264	cellular polysaccharide metabolic process	37	3477	0.000227834				GO:0016762	xyloglucan:xyloglucosyl transferase activity	20	5211	0.0113477
		GO:0007017	microtubule-based process	38	3477	0.000505469				GO:0008171	O-methyltransferase activity	22	5211	0.046047
		GO:0005976	polysaccharide metabolic process	40	3477	0.000154083				GO:0008509	anion transmembrane transporter activity	26	5211	0.0115421
		GO:0071554	cell wall organization or biogenesis	41	3477	0.000383853				GO:0016765	transferase activity, transferring alkyl or aryl (other than methyl) groups	28	5211	0.0112964
		GO:0034622	cellular protein-containing complex assembly	45	3477	7.29e-05				GO:0005507	copper ion binding	29	5211	0.0407472
		GO:0065003	protein-containing complex assembly	47	3477	6.76e-05				GO:0003777	microtubule motor activity	32	5211	0.00499475
		GO:0044262	cellular carbohydrate metabolic process	49	3477	0.00188404				GO:0003774	motor activity	34	5211	0.0101411
		GO:0043933	protein-containing complex subunit organization	50	3477	8.83e-05				GO:0070279	vitamin B6 binding	38	5211	0.0150769
		GO:0022607	cellular component assembly	52	3477	0.000264913				GO:0030170	pyridoxal phosphate binding	38	5211	0.0150769
		GO:0030001	metal ion transport	58	3477	0.00692705				GO:0008017	microtubule binding	43	5211	0.000492894
		GO:0006520	cellular amino acid metabolic process	64	3477	0.0181177				GO:0015631	tubulin binding	43	5211	0.000823192
		GO:0016043	cellular component organization	97	3477	0.0125608				GO:0046527	glucosyltransferase activity	45	5211	0.0067476
		GO:0006979	response to oxidative stress	111	3477	1.47e-12				GO:0019842	vitamin binding	46	5211	0.0237498
		GO:0071840	cellular component organization or biogenesis	113	3477	0.00624502				GO:0008092	cytoskeletal protein binding	49	5211	0.0116801
		GO:0019752	carboxylic acid metabolic process	121	3477	0.00521532				GO:0043565	sequence-specific DNA binding	104	5211	0.00584383
		GO:0043436	oxoacid metabolic process	124	3477	0.00289979				GO:0004601	peroxidase activity	107	5211	2.02e-05
		GO:0006082	organic acid metabolic process	125	3477	0.00245219				GO:0016684	oxidoreductase activity, acting on peroxide as acceptor	107	5211	2.58e-05
		GO:0006950	response to stress	181	3477	1.44e-08				GO:0016209	antioxidant activity	110	5211	4.87e-05
		GO:0050896	response to stimulus	198	3477	5.34e-07				GO:0046982	protein heterodimerization activity	139	5211	0.000338573
		GO:0005975	carbohydrate metabolic process	203	3477	1.07e-08				GO:0016758	transferase activity, transferring hexosyl groups	148	5211	0.0013048
		GO:0006468	protein phosphorylation	290	3477	0.0089653				GO:0004553	hydrolase activity, hydrolyzing O-glycosyl compounds	153	5211	0.00247355
		GO:0016310	phosphorylation	314	3477	0.00251316				GO:0003700	DNA-binding transcription factor activity	158	5211	0.00827871
		GO:0055114	oxidation-reduction process	453	3477	1.47e-12				GO:0016798	hydrolase activity, acting on glycosyl bonds	164	5211	0.00352399
		GO:0008152	metabolic process	1488	3477	0.04232				GO:0140110	transcription regulator activity	166	5211	0.0131018
		GO:0008150	biological_process	2190	3477	1.67e-05				GO:0016757	transferase activity, transferring glycosyl groups	196	5211	0.000132217
	cellular_component	GO:0031225	anchored component of membrane	8	3477	0.018133				GO:0046983	protein dimerization activity	214	5211	9.39e-09
		GO:0048046	apoplast	23	3477	0.00090018				GO:0020037	heme binding	230	5211	0.000338573
		GO:0005576	extracellular region	92	3477	1.68e-12				GO:0046906	tetrapyrrole binding	232	5211	0.000656851
		GO:0032993	protein-DNA complex	106	3477	5.51e-13				GO:0005215	transporter activity	273	5211	0.00541736
		GO:0044815	DNA packaging complex	106	3477	5.51e-13				GO:0016301	kinase activity	455	5211	0.0478555
		GO:0000786	nucleosome	106	3477	1.05e-12				GO:0016773	phosphotransferase activity, alcohol group as acceptor	459	5211	0.0208457
		GO:0016020	membrane	269	3477	0.00135621				GO:0003677	DNA binding	536	5211	0.000648089
	molecular_function	GO:0009916	alternative oxidase activity	5	3477	0.0123161				GO:0016491	oxidoreductase activity	618	5211	0.0049815
		GO:0016841	ammonia-lyase activity	5	3477	0.0370974				GO:0005524	ATP binding	655	5211	0.0493858
		GO:0003885	D-arabinono-1,4-lactone oxidase activity	6	3477	0.0242557				GO:0016740	transferase activity	978	5211	6.48e-05
		GO:0016899	oxidoreductase activity, acting on the CH-OH group of donors, oxygen as acceptor	6	3477	0.0415201				GO:0005515	protein binding	1187	5211	0.0142005
		GO:0016744	transferase activity, transferring aldehyde or ketonic groups	6	3477	0.0415201				GO:0003824	catalytic activity	2479	5211	5.78e-06
		GO:0003872	6-phosphofructokinase activity	7	3477	0.0118214
		GO:0008443	phosphofructokinase activity	7	3477	0.0211523
		GO:0071949	FAD binding	7	3477	0.0346365
		GO:0030410	nicotianamine synthase activity	8	3477	0.00572875
		GO:0052716	hydroquinone:oxygen oxidoreductase activity	9	3477	0.0238802
		GO:0005516	calmodulin binding	10	3477	0.0475406
		GO:0008483	transaminase activity	11	3477	0.0164156
		GO:0016769	transferase activity, transferring nitrogenous groups	11	3477	0.0164156
		GO:0008146	sulfotransferase activity	13	3477	0.0135344
		GO:0016682	oxidoreductase activity, acting on diphenols and related substances as donors, oxygen as acceptor	14	3477	0.00526247
		GO:0016762	xyloglucan:xyloglucosyl transferase activity	14	3477	0.0183607
		GO:0016782	transferase activity, transferring sulfur-containing groups	14	3477	0.0423635
		GO:0016679	oxidoreductase activity, acting on diphenols and related substances as donors	16	3477	0.0145212
		GO:0016760	cellulose synthase (UDP-forming) activity	17	3477	0.000536118
		GO:0016759	cellulose synthase activity	17	3477	0.000536118
		GO:0042910	xenobiotic transmembrane transporter activity	18	3477	0.0317694
		GO:0008171	O-methyltransferase activity	21	3477	0.00183368
		GO:0030145	manganese ion binding	21	3477	0.00749621
		GO:0004867	serine-type endopeptidase inhibitor activity	21	3477	0.0127032
		GO:0035251	UDP-glucosyltransferase activity	21	3477	0.0204457
		GO:0030414	peptidase inhibitor activity	23	3477	0.024374
		GO:0004866	endopeptidase inhibitor activity	23	3477	0.024374
		GO:0061135	endopeptidase regulator activity	23	3477	0.024374
		GO:0061134	peptidase regulator activity	23	3477	0.024374
		GO:0016831	carboxy-lyase activity	24	3477	0.0064132
		GO:0005507	copper ion binding	25	3477	0.00409085
		GO:0045735	nutrient reservoir activity	25	3477	0.0435842
		GO:0016830	carbon-carbon lyase activity	28	3477	0.00902992
		GO:0003777	microtubule motor activity	32	3477	1.02e-05
		GO:0003774	motor activity	33	3477	4.47e-05
		GO:0008194	UDP-glycosyltransferase activity	33	3477	0.0396327
		GO:0046527	glucosyltransferase activity	35	3477	0.00163197
		GO:0070279	vitamin B6 binding	36	3477	9.16e-05
		GO:0030170	pyridoxal phosphate binding	36	3477	9.16e-05
		GO:0008017	microtubule binding	37	3477	1.07e-05
		GO:0015631	tubulin binding	37	3477	1.9e-05
		GO:0019842	vitamin binding	41	3477	0.000383853
		GO:0016614	oxidoreductase activity, acting on CH-OH group of donors	42	3477	0.0364563
		GO:0008092	cytoskeletal protein binding	43	3477	0.000180928
		GO:0009055	electron transfer activity	64	3477	0.0226321
		GO:0043565	sequence-specific DNA binding	74	3477	0.00398628
		GO:0005509	calcium ion binding	74	3477	0.0106561
		GO:0046982	protein heterodimerization activity	107	3477	6.67e-13
		GO:0003700	DNA-binding transcription factor activity	110	3477	0.00722533
		GO:0140110	transcription regulator activity	112	3477	0.0235567
		GO:0004601	peroxidase activity	116	3477	1.45e-12
		GO:0016684	oxidoreductase activity, acting on peroxide as acceptor	116	3477	1.63e-12
		GO:0016209	antioxidant activity	117	3477	1.87e-12
		GO:0004553	hydrolase activity, hydrolyzing O-glycosyl compounds	117	3477	8.36e-05
		GO:0016705	oxidoreductase activity, acting on paired donors, with incorporation or reduction of molecular oxygen	123	3477	0.000103322
		GO:0016798	hydrolase activity, acting on glycosyl bonds	125	3477	0.000117989
		GO:0016758	transferase activity, transferring hexosyl groups	127	3477	1.19e-07
		GO:0005506	iron ion binding	127	3477	0.000102262
		GO:0016757	transferase activity, transferring glycosyl groups	156	3477	1.21e-07
		GO:0046983	protein dimerization activity	169	3477	4.96e-12
		GO:0005215	transporter activity	184	3477	0.011276
		GO:0020037	heme binding	232	3477	6.12e-12
		GO:0046906	tetrapyrrole binding	233	3477	1.37e-11
		GO:0004672	protein kinase activity	292	3477	0.0132443
		GO:0016301	kinase activity	316	3477	0.0181014
		GO:0016773	phosphotransferase activity, alcohol group as acceptor	319	3477	0.00764763
		GO:0003677	DNA binding	356	3477	0.00427524
		GO:0016491	oxidoreductase activity	532	3477	1.21e-07
		GO:0016740	transferase activity	688	3477	1.55e-06
		GO:0097159	organic cyclic compound binding	1249	3477	0.0293199
		GO:1901363	heterocyclic compound binding	1249	3477	0.0293199
		GO:0003824	catalytic activity	1824	3477	7.46e-20
